# Supplementary material for: Enhanced performance of PbS-sensitized solar cells via controlled successive ionic-layer adsorption and reaction
Source: Royal Society of Chemistry journal article supplement (doi:10.1039/c5cp00941c), 2015-01-01
Supplement: c5cp00941c1.pdf [file c5cp00941c1.pdf]

## *Supporting Information*

# Enhanced performance of PbS-sensitized solar cells via controlled successive ionic layer adsorption and reaction

*Muhammad A. Abbas<sup>a‡</sup>, Muhammad A. Basit<sup>b‡</sup>, Tae Joo Park<sup>\*ab</sup> and Jin Ho Bang<sup>\*acd</sup>*

<sup>a</sup> Department of Advanced Material Science and Engineering, Hanyang University, 55 Hanyangdaehak-ro, Sangnok-gu, Ansan, Kyeonggi-do 426-791, Republic of Korea.

<sup>b</sup> Department of Materials Science and Engineering, Hanyang University.

<sup>c</sup> Department of Bionanotechnology, Hanyang University.

<sup>d</sup> Department of Chemistry and Applied Chemistry, Hanyang University.

E-mail: jbang@hanyang.ac.kr (JHB); tjp@hanyang.ac.kr (TJP)

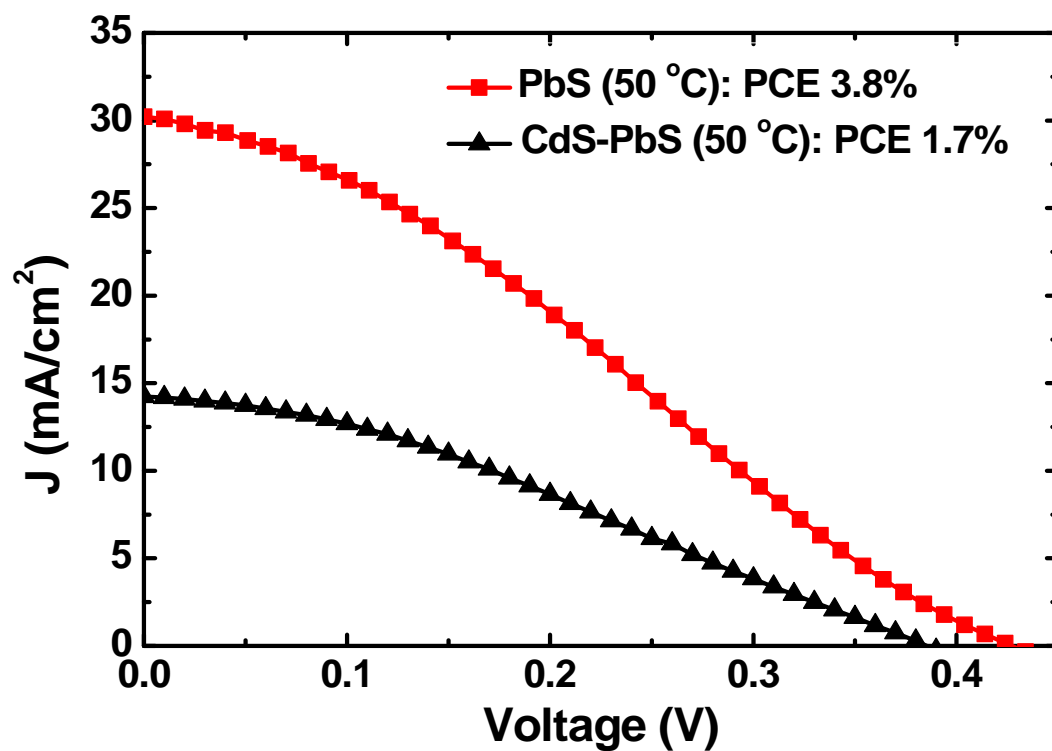

**Fig. S1** *J-V* curves of PbS and CdS-PbS-sensitized solar cells when PbS deposition was performed at 50 °C by SILAR.

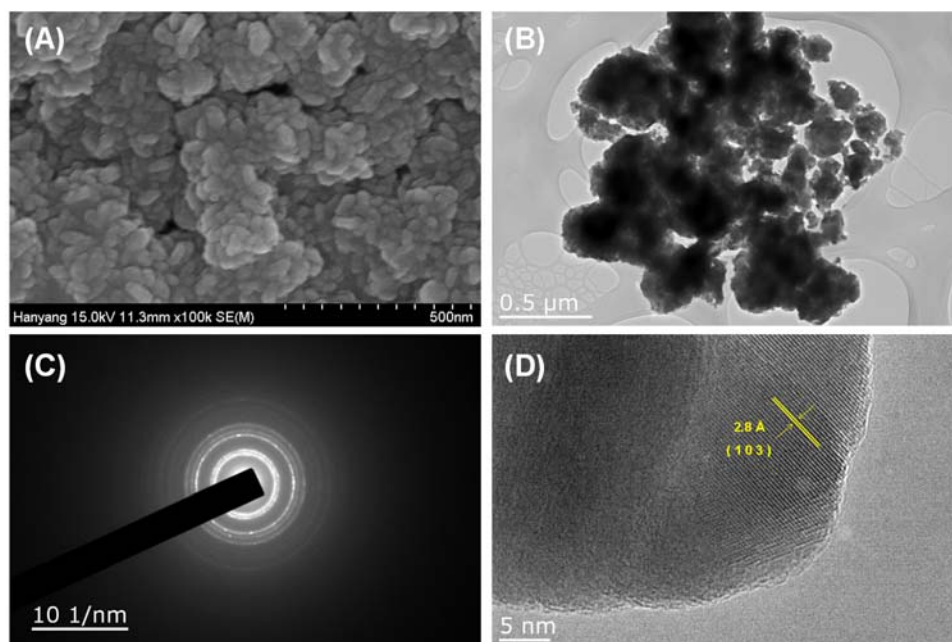

**Fig. S2** (A) SEM, (B) low-resolution TEM, (C) selected area electron diffraction pattern, and (D) high-resolution TEM images of CuS counter electrode.

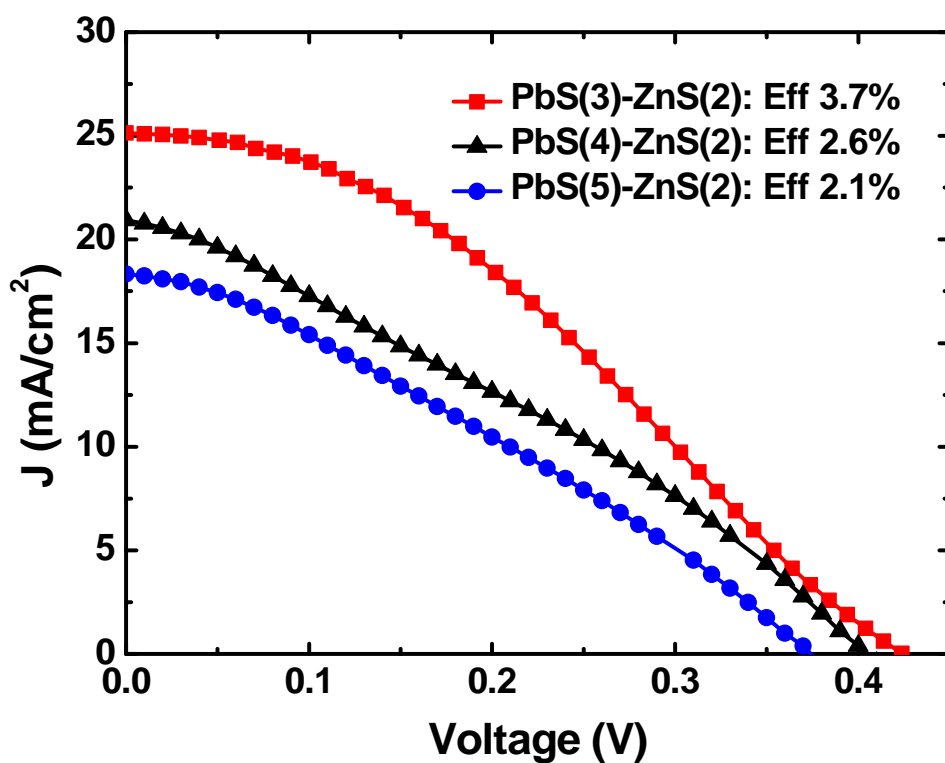

Fig. S3  $J$ - $V$  curves of PbS sensitized solar cells as a function of PbS SILAR cycles.

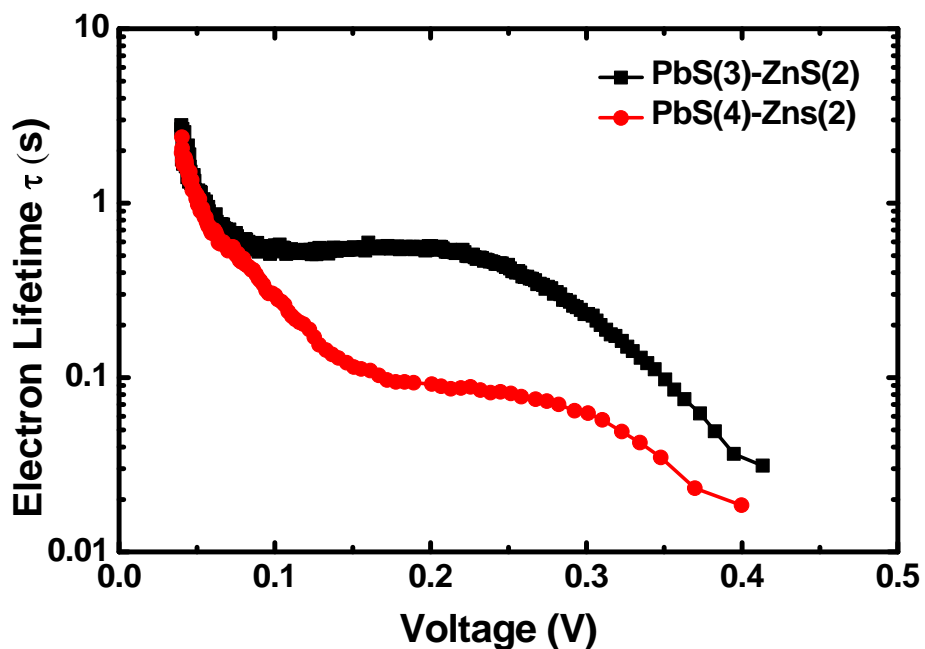

Fig. S4 Electron Lifetime calculated from open-circuit voltage decay of PbS-sensitized solar cells prepared with 3 and 4 SILAR cycles.

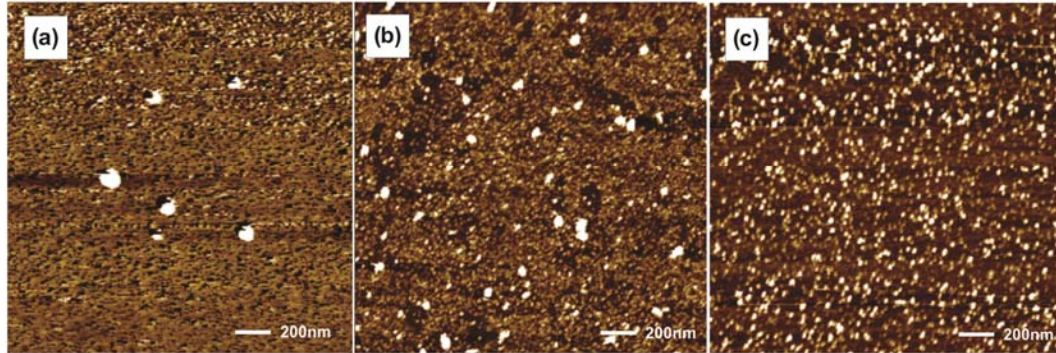

**Fig. S5** AFM images of PbS (3 cycles) and ZnS (2 cycles) films deposited by SILAR at (a) 10 °C, (b) 30 °C, and (c) 50 °C. Quantum dots were deposited on thin TiO<sub>2</sub> film formed on HF-etched Si wafer by atomic layer deposition. The area of images is 2×2 μm.

**Table S1** Maximum peak-to-valley height of films deposited at different temperature

| Sample | R <sub>pv</sub> (maximum peak-to-valley height) |
|--------|-------------------------------------------------|
| 10 °C  | 101.001 nm                                      |
| 30 °C  | 34.801 nm                                       |
| 50 °C  | 15.280 nm                                       |

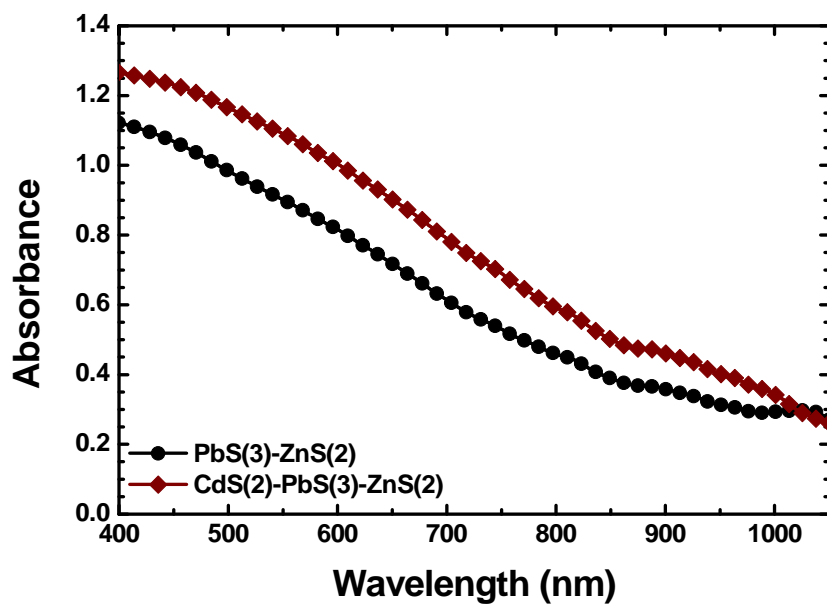

**Fig. S6** UV-Vis absorption spectra of optimized PbS and CdS-PbS co-sensitized solar cells.

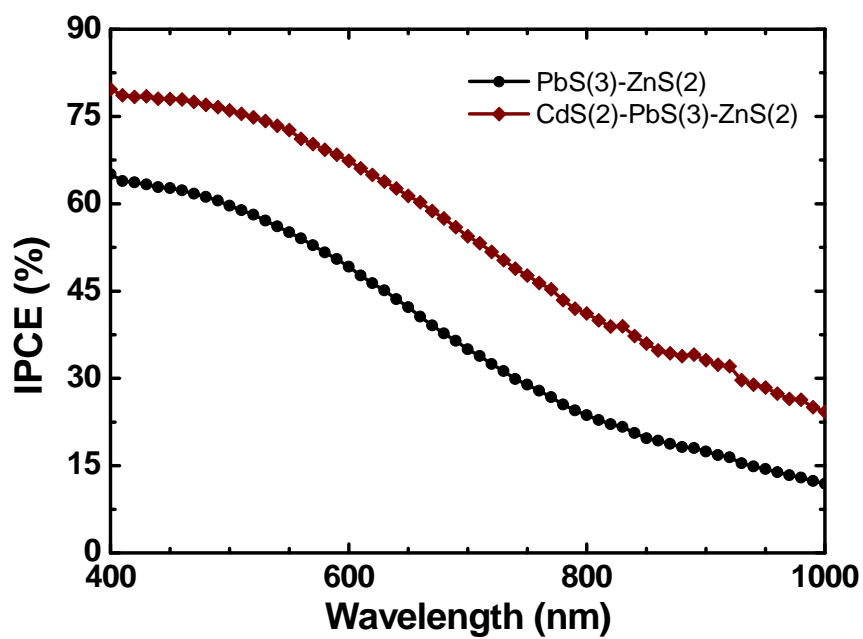

**Fig. S7** IPCE spectra of optimized PbS and CdS-PbS co-sensitized solar cell.
